# Supplementary material
Source: MDPI journal article supplement (https://www.mdpi.com/2673-7264/3/2/17)
Supplement: s1 [file s1]

**Table S1. Elemental and Proximate analysis of MSW after torrefaction for each experimental run.**

| T                                      | Elemental analysis<br>(wt.%, dry basis) |         |          |          |          | MC<br>(wt.%,<br>dry<br>basis) | Proximate<br>analysis<br>(wt.%, dry basis) |          |          | HHV<br>(MJ/kg) | Theoretical<br>HHV (MJ/kg) |
|----------------------------------------|-----------------------------------------|---------|----------|----------|----------|-------------------------------|--------------------------------------------|----------|----------|----------------|----------------------------|
|                                        | C                                       | H       | N        | O        | S        |                               | FC                                         | VM       | Ash      |                |                            |
| <i>1<sup>st</sup> experimental run</i> |                                         |         |          |          |          |                               |                                            |          |          |                |                            |
| 200                                    | 45.0±0.9                                | 7.9±0.2 | 0.78±0.0 | 46.3±0.9 | 0.3±0.0  | 44.0±0.9                      | 7.0±0.2                                    | 44.9±0.9 | 3.9±0.08 | 24.9±0.5       | 20.1±0.5                   |
| 250                                    | 48.1±0.9                                | 7.2±0.2 | 0.83±0.0 | 43.6±0.9 | 0.28±0.0 | 41.9±0.9                      | 8.3±0.2                                    | 44.7±0.9 | 5.2±0.1  | 24.9±0.5       | 20.7±0.5                   |
| 300                                    | 52.7±1.0                                | 6.8±0.2 | 0.84±0.0 | 39.5±0.9 | 0.21±0.0 | 38.7±0.9                      | 10.1±0.2                                   | 44.3±0.9 | 6.9±0.1  | 25.1±0.5       | 22.2±0.5                   |
| <i>2<sup>nd</sup> experimental run</i> |                                         |         |          |          |          |                               |                                            |          |          |                |                            |
| 200                                    | 48.1±0.9                                | 7.8±0.2 | 0.81±0.0 | 43.2±0.9 | 0.31±0.0 | 45.1±0.9                      | 7.9±0.2                                    | 43.2±0.9 | 3.9±0.08 | 24.0±0.5       | 21.4±0.5                   |
| 250                                    | 48.0±0.9                                | 7.0±0.2 | 0.79±0.0 | 43.9±0.9 | 0.23±0.0 | 41.4±0.9                      | 8.0±0.2                                    | 45.5±0.9 | 5.2±0.1  | 24.8±0.5       | 20.4±0.5                   |
| 300                                    | 53.1±1.0                                | 6.1±0.2 | 0.82±0.0 | 39.7±0.9 | 0.21±0.0 | 38.3±0.9                      | 10.0±0.2                                   | 44.8±0.9 | 6.9±0.1  | 25.0±0.5       | 21.5±0.5                   |
| <i>3<sup>rd</sup> experimental run</i> |                                         |         |          |          |          |                               |                                            |          |          |                |                            |
| 200                                    | 43.8±0.9                                | 7.9±0.2 | 0.79±0.0 | 47.4±0.9 | 0.28±0.0 | 44.8±0.9                      | 7.1±0.2                                    | 44.2±0.9 | 3.9±0.08 | 24.7±0.5       | 19.7±0.5                   |
| 250                                    | 48.1±0.9                                | 7.6±0.2 | 0.85±0.0 | 43.3±0.9 | 0.28±0.0 | 41.2±0.9                      | 8.7±0.2                                    | 43.6±0.9 | 5.5±0.1  | 24.0±0.5       | 21.0±0.5                   |
| 300                                    | 52.8±1.0                                | 6.9±0.2 | 0.88±0.0 | 39.2±0.9 | 0.23±0.0 | 38.5±0.9                      | 10.0±0.2                                   | 44.9±0.9 | 6.1±0.1  | 25.8±0.5       | 22.4±0.5                   |

Equation for calculation the theoretical HHV values (Eq. S1):

$$HHV \left( \frac{MJ}{kg} \right) = 0.3491 \cdot C \text{ (wt. \%)} + 1.1783 \cdot H \text{ (wt. \%)} + 0.1005 \cdot S \text{ (wt. \%)} - 0.1034 \cdot O \text{ (wt. \%)} - 0.0151 \cdot N \text{ (wt. \%)} - 0.0211 \cdot sh \text{ (wt. \%)} \quad (S1)$$
